# Supplementary material for: Divide and Conquer May Not Be the Optimal Approach to Retain the Desirable Estrogenic Attributes of the Cyclopia Nutraceutical Extract, SM6Met
Source: PubMed Central journal article supplement (PMC4514865; doi:10.1371/journal.pone.0132950), 2015-07-24
Supplement: pone.0132950.s005.pdf [file pone.0132950.s005.pdf]

**S1Table. LC-MS/MS data (S4 Fig.) of compounds present in SM6Met and subsequent fractions obtained during activity-guided fractionation.**

| Nr | t <sub>R</sub> <sup>a</sup> | λ <sub>max</sub>   | [M-H] <sup>+</sup> | Fragment ions                                | Compound                                          | Class                | Notes <sup>b</sup> | SM6Met         | PF             | NPF | F1 | F2 | F3 |
|----|-----------------------------|--------------------|--------------------|----------------------------------------------|---------------------------------------------------|----------------------|--------------------|----------------|----------------|-----|----|----|----|
| 1  | 2.7                         | 293                | 569                | 479, 449, 317, 287* <sup>c</sup>             | Iriflophenone-3-C-β-D-glucoside-4-O-β-D-glucoside | Benzophenone         | ID                 | x <sup>d</sup> | X <sup>e</sup> | x   | x  |    |    |
| 2  | 4.1                         | 259, 293           | 153                | No fragments observed                        | Protocatechuic acid                               | Hydroxybenzoic acid  | ID                 | X              |                | X   |    |    | X  |
| 3  | 5.6                         | 286                | 611                | 491, 431, 401, 371*                          | (S)-Eriodictyol-di-C-hexoside                     | Flavanone            | [3]                | x              | x              | x   | x  |    |    |
| 4  | 5.7                         | 286                | 611                | 491, 431, 401, 371*                          | (R)-Eriodictyol-di-C-hexoside                     | Flavanone            | [3]                | x              | x              | x   | x  |    |    |
| 5  | 5.8                         | 294                | 407                | 317, 287*, 257, 245, 215, 201, 193, 165, 125 | Iriflophenone-3-C-β-D-glucoside                   | Benzophenone         | ID                 | X              | x              | X   |    | X  | x  |
| 6  | 7.3                         | 285                | 595                | 475, 415, 385*, 355                          | Naringenin-di-C-hexoside                          | Flavanone            | [3]                | x              | x              | x   | x  |    |    |
| 7  | 8.4                         | 239, 257, 317, 366 | 421                | 331, 301*, 271, 259                          | Mangiferin                                        | Xanthones            | ID                 | X              | x              | X   |    |    | X  |
| 8  | 8.8                         | 240, 255, 316, 365 | 421                | 331, 301*, 271, 259                          | Isomangiferin                                     | Xanthones            | ID                 | X              | x              | X   |    |    | X  |
| 9  | 9.0                         | 231, 270, 330      | 593                | 503, 473*, 383, 353                          | Vicenin-2 (apigenin-6,8-di-C-β-D-glucoside)       | Flavone              | ID                 | x              | x              | x   | X  | x  |    |
| 10 | 10.1                        | 281                | 449                | 287, 151*, 135                               | Eriodictyol-O-glucoside                           | Flavanone            | [3]                | x              |                | x   |    |    | x  |
| 11 | 11.2                        | 285                | 613                | 475, 433, 403, 373*, 361, 331, 209           | 3-Hydroxyphloretin-3',5'-di-C-hexoside            | Dihydrochalcone      | [3]                | X              | X              | X   | X  | x  | x  |
| 12 | 11.3                        | 309                | 163                | No fragments observed                        | p-Coumaric acid                                   | Hydroxycinnamic acid | ID                 | x              | x              | X   |    |    | X  |
| 13 | 12.0                        | 283                | 595                | 287, 151*                                    | Eriocitrin (eriodictyol-7-O-rutinoside)           | Flavanone            | ID                 | X              | x              | X   | X  | X  |    |
| 14 | 13.0                        | 265, 348           | 593                | 285                                          | Scolymoside (luteolin-7-O-rutinoside)             | Flavone              | ID                 | X              | X              | X   |    | x  | X  |
| 15 | 13.3                        | 284                | 597                | 459, 417, 387, 357*, 345, 315                | Phloretin-3',5'-di-C-β-D-glucoside                | Dihydrochalcone      | ID                 | X              | X              | X   | X  | x  | x  |
| 16 | 13.6                        | 254, 265, 348      | 447                | 285                                          | Luteolin-O-hexoside                               | Flavone              | NC                 | x              |                | x   |    |    | x  |
| 17 | 14.3                        | 282                | 579                | 271*, 151                                    | Naringenin-O-dihexoside                           | Flavanone            | [3]                | x              | x              | x   |    |    | x  |
| 18 | 15.0                        | 266, 337           | 577                | 269                                          | Isorhoifolin (apigenin-7-O-rutinoside)            | Flavone              | NC                 | x              | x              | x   |    |    | x  |
| 19 | 15.5                        | 283                | 609                | 301                                          | Hesperidin (hesperetin-7-O-rutinoside)            | Flavanone            | ID                 | X              | X              | X   | x  | X  | x  |
| 20 | 15.8                        | 252, 265, 346      | 607                | 299*, 284                                    | Chrysoeriol-O-deoxyhexose-O-hexoside              | Flavone              | NC                 | x              | x              | x   |    |    | x  |
| 21 | 18.0                        | 259, 375           | 609                | 301                                          | Quercetin-O-deoxyhexose-O-hexoside                | Flavonol             | NC                 | x              |                |     |    | x  |    |
| 22 | 21.0                        | 252, 265, 348      | 285                | No fragments observed                        | Luteolin                                          | Flavone              | ID                 | x              |                | x   |    |    | x  |

<sup>a</sup> indicates the polyphenol retention time

<sup>b</sup> MS data from literature used to tentatively identify compounds

<sup>c</sup> \* indicates the major daughter ion

<sup>d</sup> Minor polyphenols in extract are represented by "x"

<sup>e</sup> Major polyphenols in extract are represented by "X"

ID refers to the fact that the compound was identified by means of an authentic reference standard

NC refers to the presence of a compound not identified before and further structure elucidation is required
