# Supplementary material for: Divide and Conquer May Not Be the Optimal Approach to Retain the Desirable Estrogenic Attributes of the Cyclopia Nutraceutical Extract, SM6Met
Source: PubMed Central journal article supplement (PMC4514865; doi:10.1371/journal.pone.0132950), 2015-07-24
Supplement: pone.0132950.s006.pdf [file pone.0132950.s006.pdf]

**S2 Table. Purification table of estrogenic activity.**

|               | ER $\alpha$        |                  |                         |     | ER $\beta$         |     |                     | Proliferation     |                    |                     |
|---------------|--------------------|------------------|-------------------------|-----|--------------------|-----|---------------------|-------------------|--------------------|---------------------|
|               | Agonist activity   |                  | Antagonist activity     |     | Agonist activity   |     | Antagonist activity | Agonist activity  |                    | Antagonist activity |
|               | Fold <sup>a</sup>  | PuF <sup>b</sup> | % decrease <sup>c</sup> | PuF | Fold               | PuF | % decrease          | Fold              | % decrease         | PuF                 |
| <b>SM6Met</b> | 1.8 <sup>#</sup>   | 1.0              | 30% <sup>##</sup>       | 1.0 | 2.2 <sup>###</sup> | 1.0 | —                   | —                 | 18% <sup>##</sup>  | 1.0                 |
| <b>PF</b>     | —                  | —                | 36% <sup>###</sup>      | 1.2 | —                  | —   | —                   | —                 | 17% <sup>##</sup>  | 0.94                |
| <b>NPF</b>    | —                  | —                | 41% <sup>###</sup>      | 1.4 | 2.3 <sup>###</sup> | 1.1 | —                   | —                 | 17% <sup>##</sup>  | 0.94                |
| <b>F1</b>     | —                  | —                | 52% <sup>###</sup>      | 1.7 | —                  | —   | 46% <sup>###</sup>  | —                 | —                  | —                   |
| <b>F2</b>     | —                  | —                | 54% <sup>###</sup>      | 1.8 | —                  | —   | —                   | —                 | 16% <sup>###</sup> | 0.90                |
| <b>F3</b>     | 1.6 <sup>###</sup> | 0.9              | —                       | —   | 4.5 <sup>##</sup>  | 2.1 | —                   | 1.4 <sup>ns</sup> | —                  | —                   |

<sup>a</sup> Fold-induction relative to solvent (Figs. 2 and 3)

<sup>b</sup> PuF refers to purification factor (activity of compound in fraction/ activity of compound in SM6Met)

<sup>c</sup> Percentage decrease in induction relative to 10<sup>-11</sup> M E<sub>2</sub> set as 100% for promoter reporter studies and 10<sup>-9</sup> M E<sub>2</sub> set as 100% for proliferation studies (Figs. 2&3)

— refers to no activity: for agonist mode this implies no statistical difference from solvent, while for antagonist mode it implies no statistical difference from 10<sup>-11</sup> M E<sub>2</sub> for promoter reporter studies and 10<sup>-9</sup> M E<sub>2</sub> for proliferation studies.

Statistical analysis was done using One-way ANOVA with Dunnett's post-test comparing all values to E<sub>2</sub> (#, P<0.05; ##, P<0.01; ###, P<0.001).
